# Supplementary material
Source: publisher figshare collection journal article supplement (https://gsajournals.figshare.com/ndownloader/files/25768559)

**Supplementary Figure Figure_S2**

Descriptive statistics and histograms of DNA region size distributions for (A) GC-balanced and (B) AT-rich regions of the reference *A. lentis* Al4 assembly compared with the reference genome assembly for the closely related Didymellaceae species, *A. rabiei* isolate ME14 (Shah et al., 2020). For *A. lentis* and *A. rabiei* both the number and overall base count for GC-balanced and AT-rich DNA regions were similar. Size distributions for AT-rich and GC-balanced regions were shown, using the Kolmogorov-Smirnov (KS) test for comparison of size distribution, to be not the same. For *A. lentis* there was a higher frequency of longer regions for GC-balanced DNA in the size range from 20 to 120 Kb and for AT-rich DNA, from 5 to 20 Kb. The number of short GC-balanced (0-20 Kb) and short AT-rich DNA (0-5 Kb) was lower for *A. lentis* than for *A. rabiei*.

| **Descriptive statistics** | **GC-balanced regions (Kb)** | | **AT-rich regions (Kb)** | |
| --- | --- | --- | --- | --- |
|  | *A. lentis* | *A.rabiei* | *A. lentis* | *A.rabiei* |
| Sum | 32634 | 32286 | 9340 | 8603 |
| Count | 567 | 563 | 580 | 556 |
| Mean | 57.6 | 57.3 | 16.1 | 15.5 |
| Median | 19.8 | 10.1 | 10.7 | 8.5 |
| Mode | 1.1 | 1.9 | 1.3 | 2.0 |
| Standard Deviation | 90.0 | 113.2 | 18.2 | 17.6 |
| Kurtosis | 15.5 | 17.4 | 9.5 | 5.8 |
| Skewness | 3.3 | 3.7 | 2.6 | 2.2 |
| Minimum | 1.002 | 1.042 | 1.023 | 1.452 |
| Maximum | 729 | 1019 | 145 | 107 |
| KS D statistic | 0.12 | | 0.095 | |
| KS p-value | 0.0004 | | 0.011 | |


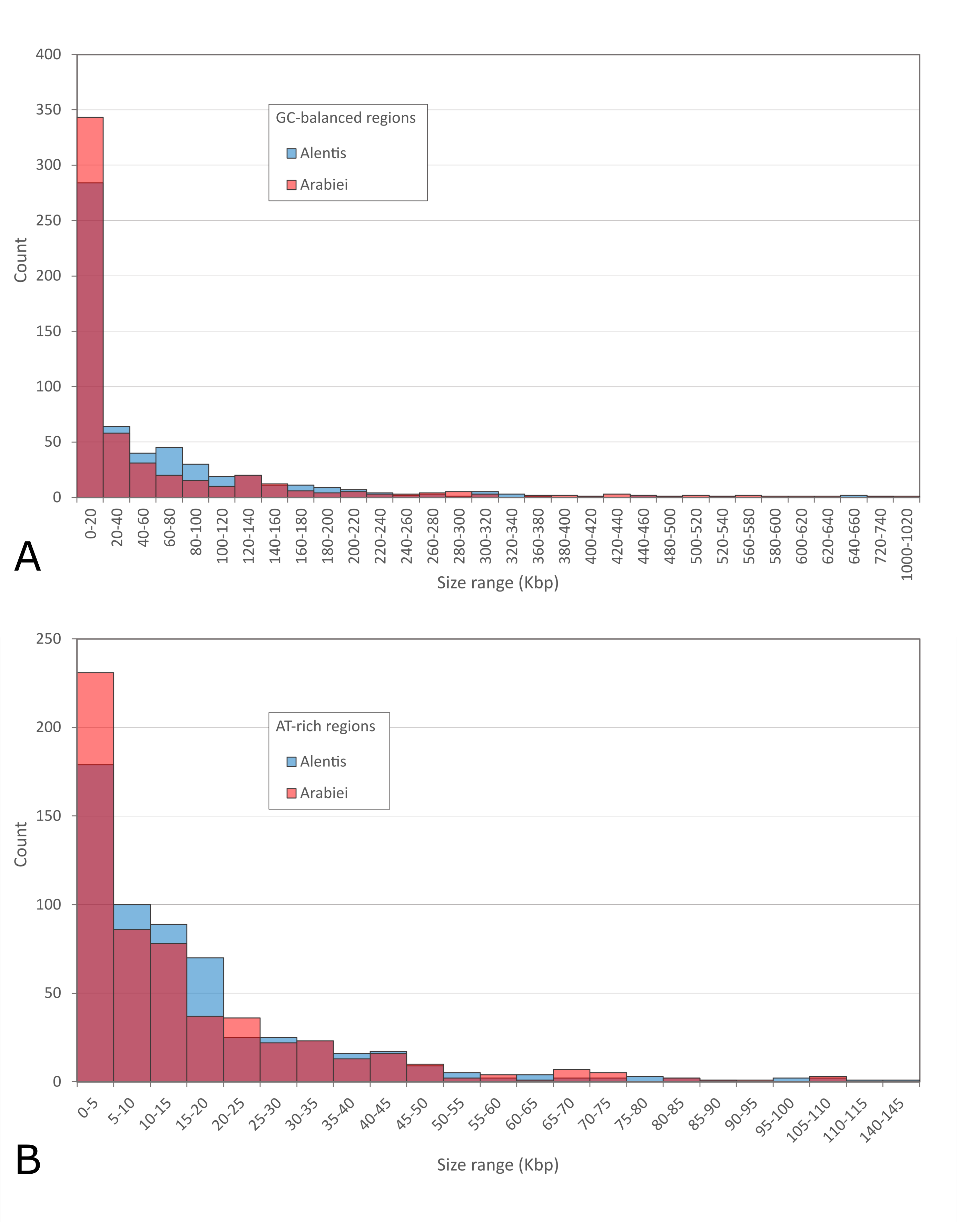

Supplement: Supplementary file 1 [file 25768559]
